# Supplementary material
Source: HighWire-hosted journal article supplement (https://gut.bmj.com/content/71/3/457)
Supplement: inline-supplementary-material-1 [file inline-supplementary-material-1.pdf]

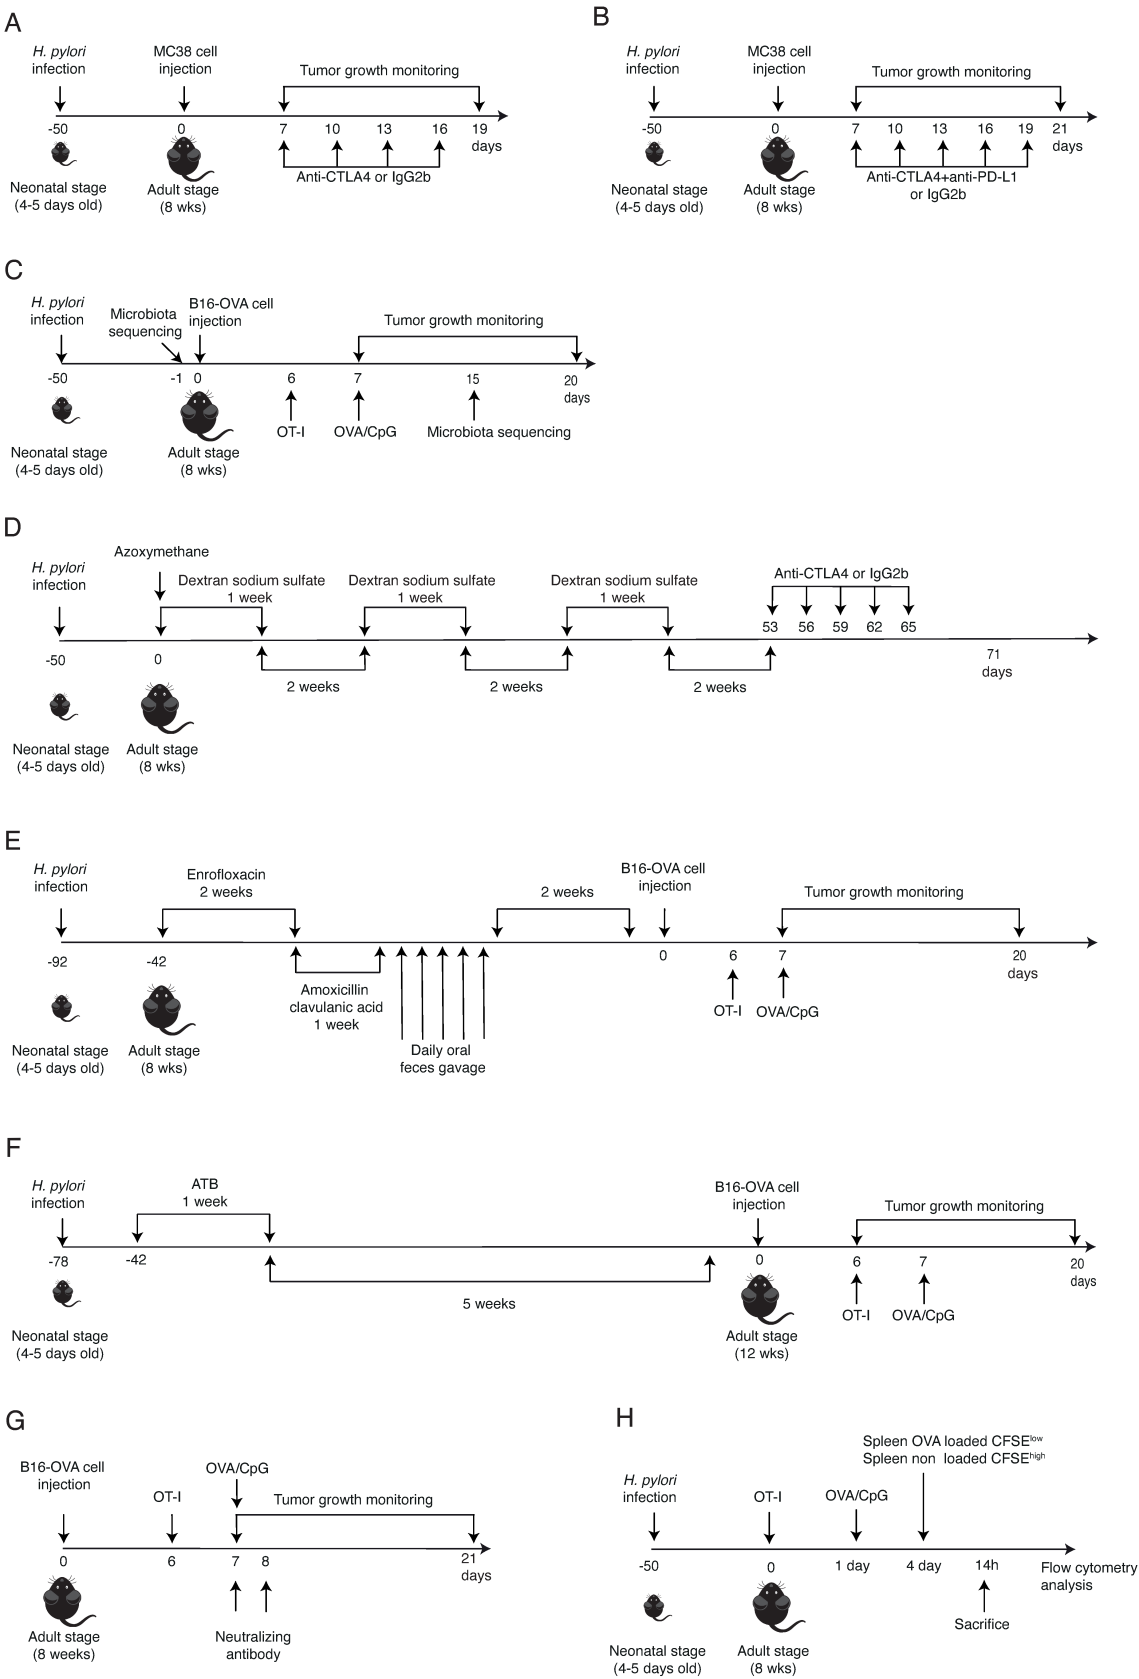

Supplementary figure 1. Description of the mouse tumor models.

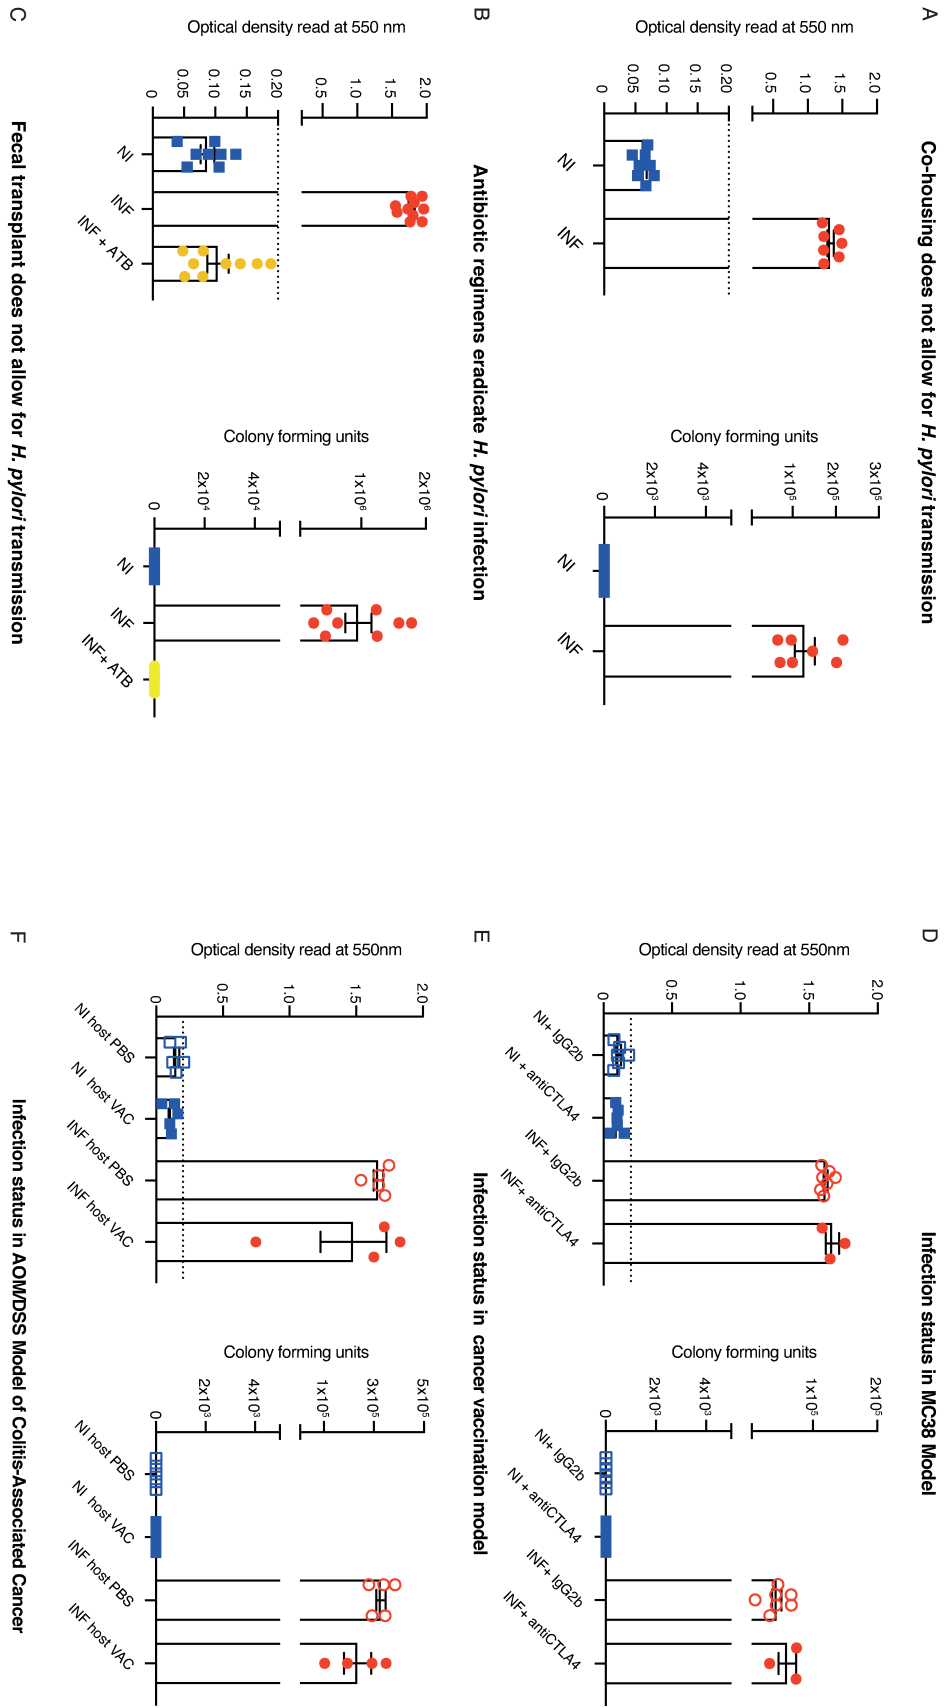

Supplementary figure 2. Infection status of mice

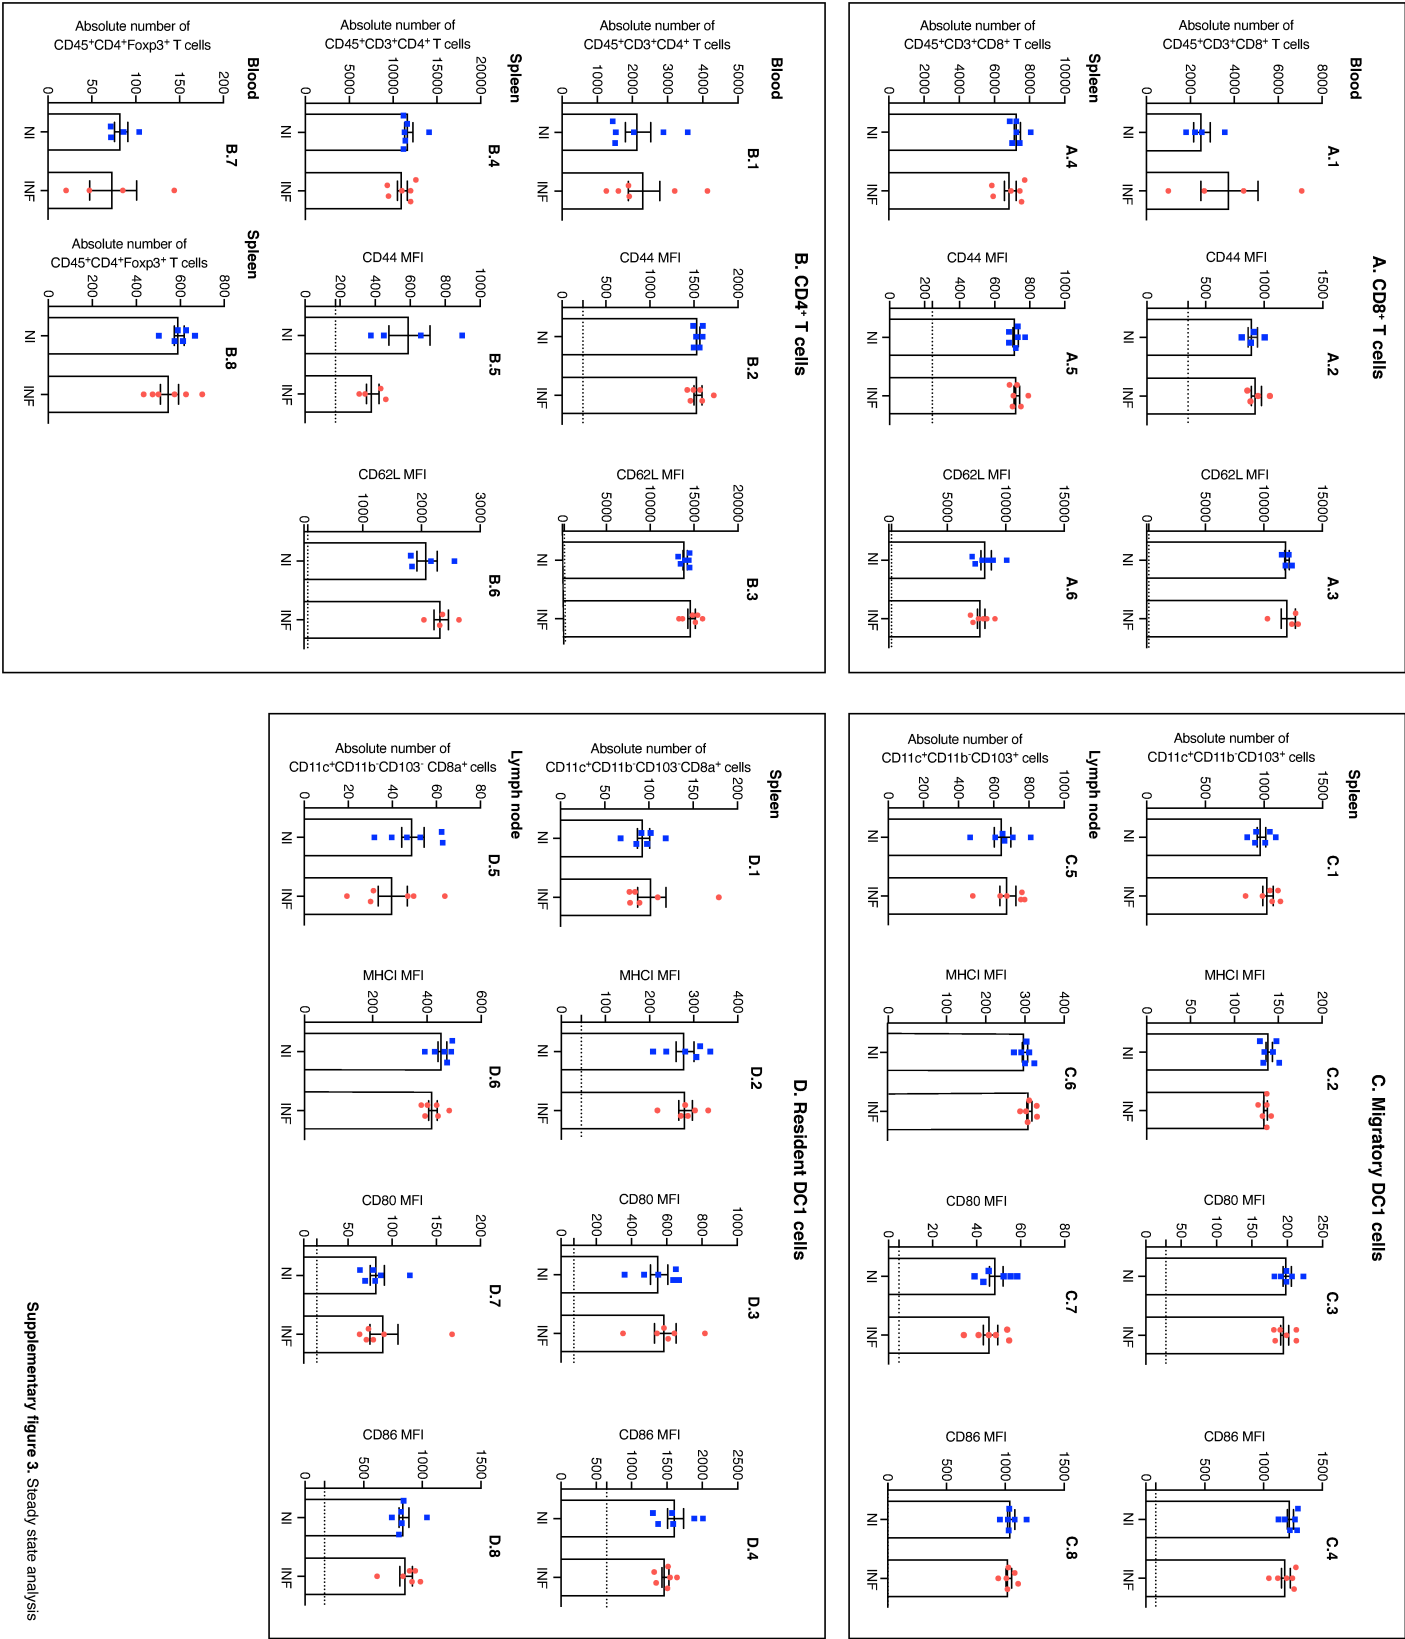

Supplementary figure 3. Steady state analysis

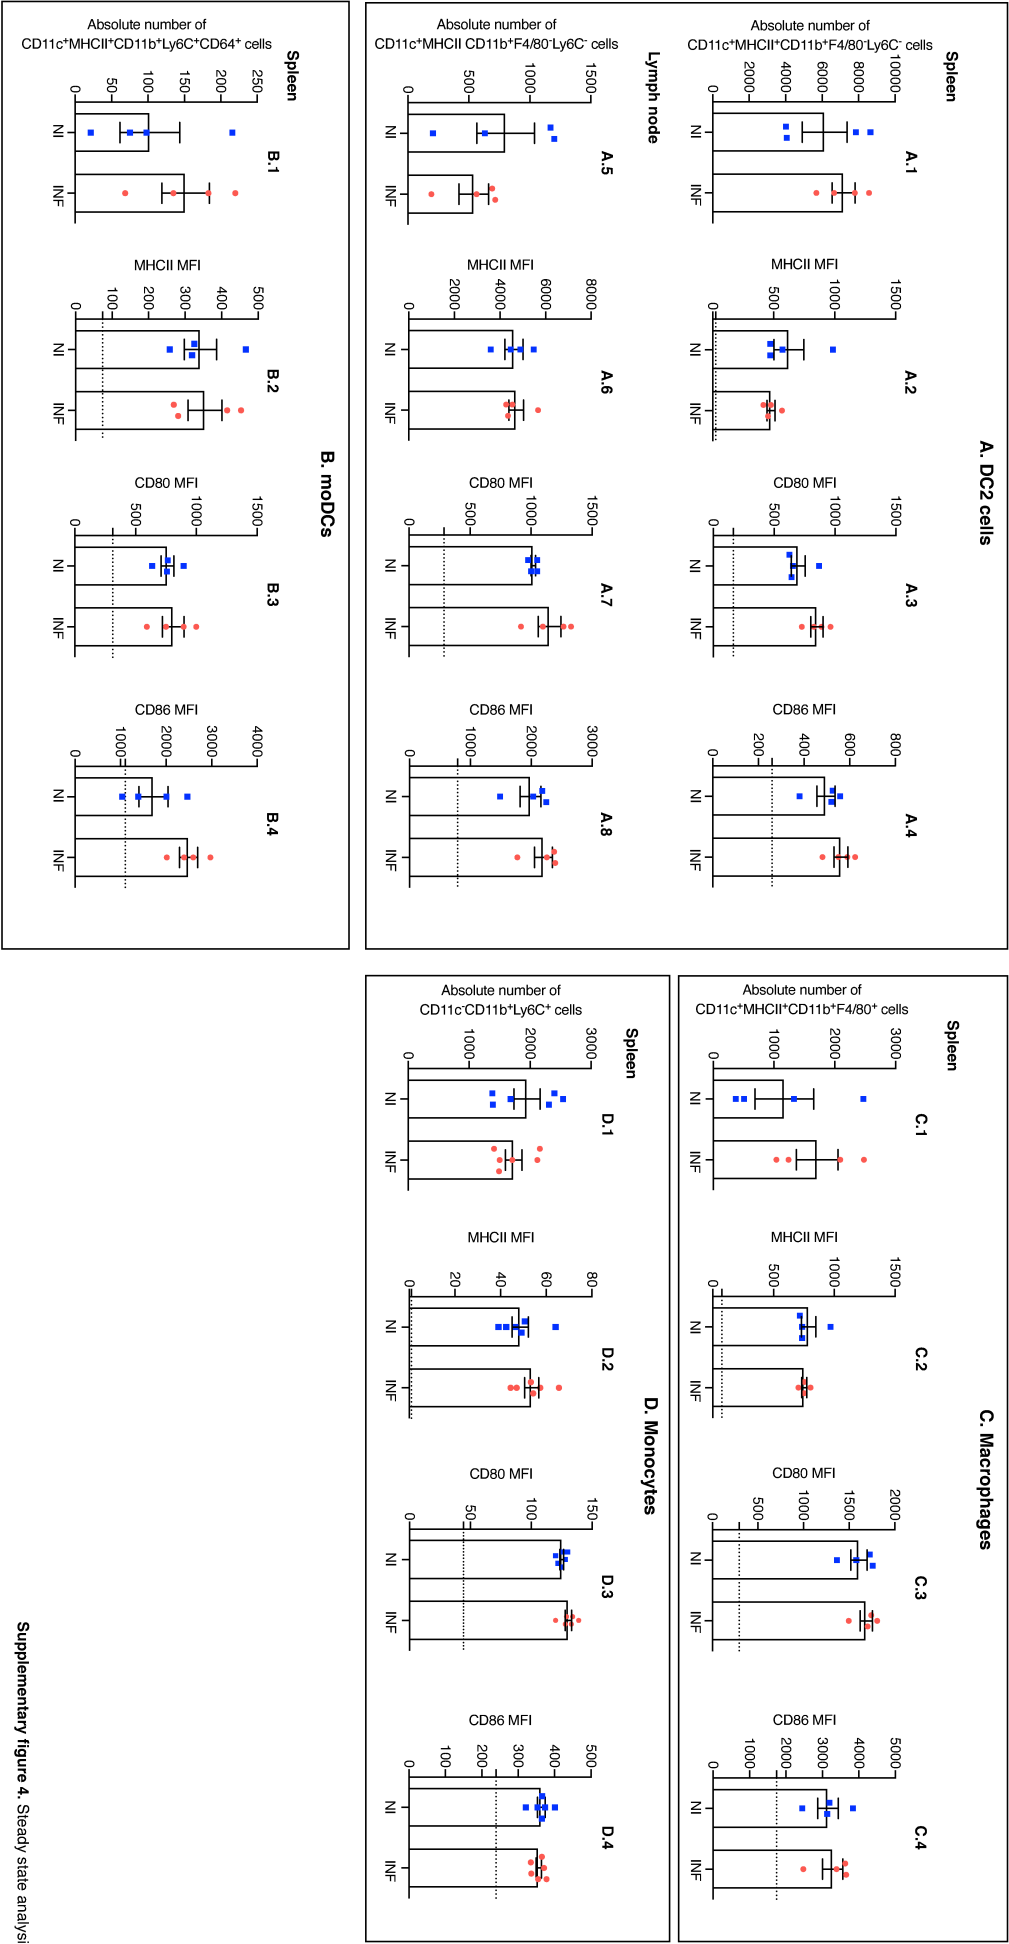

Supplementary figure 4. Steady state analysis

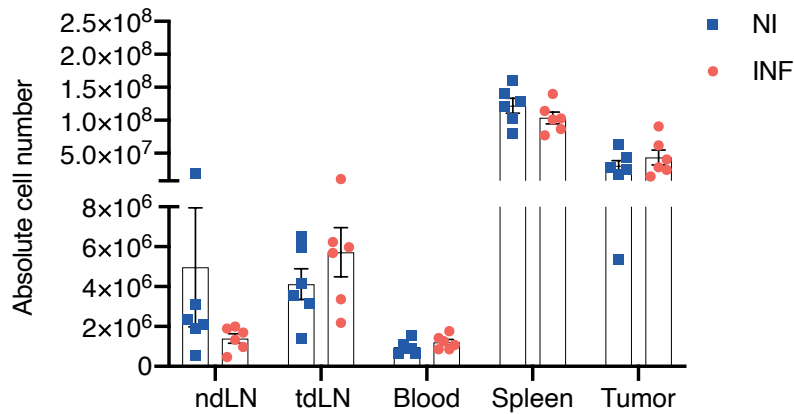

Supplementary figure 5. Cell Counts

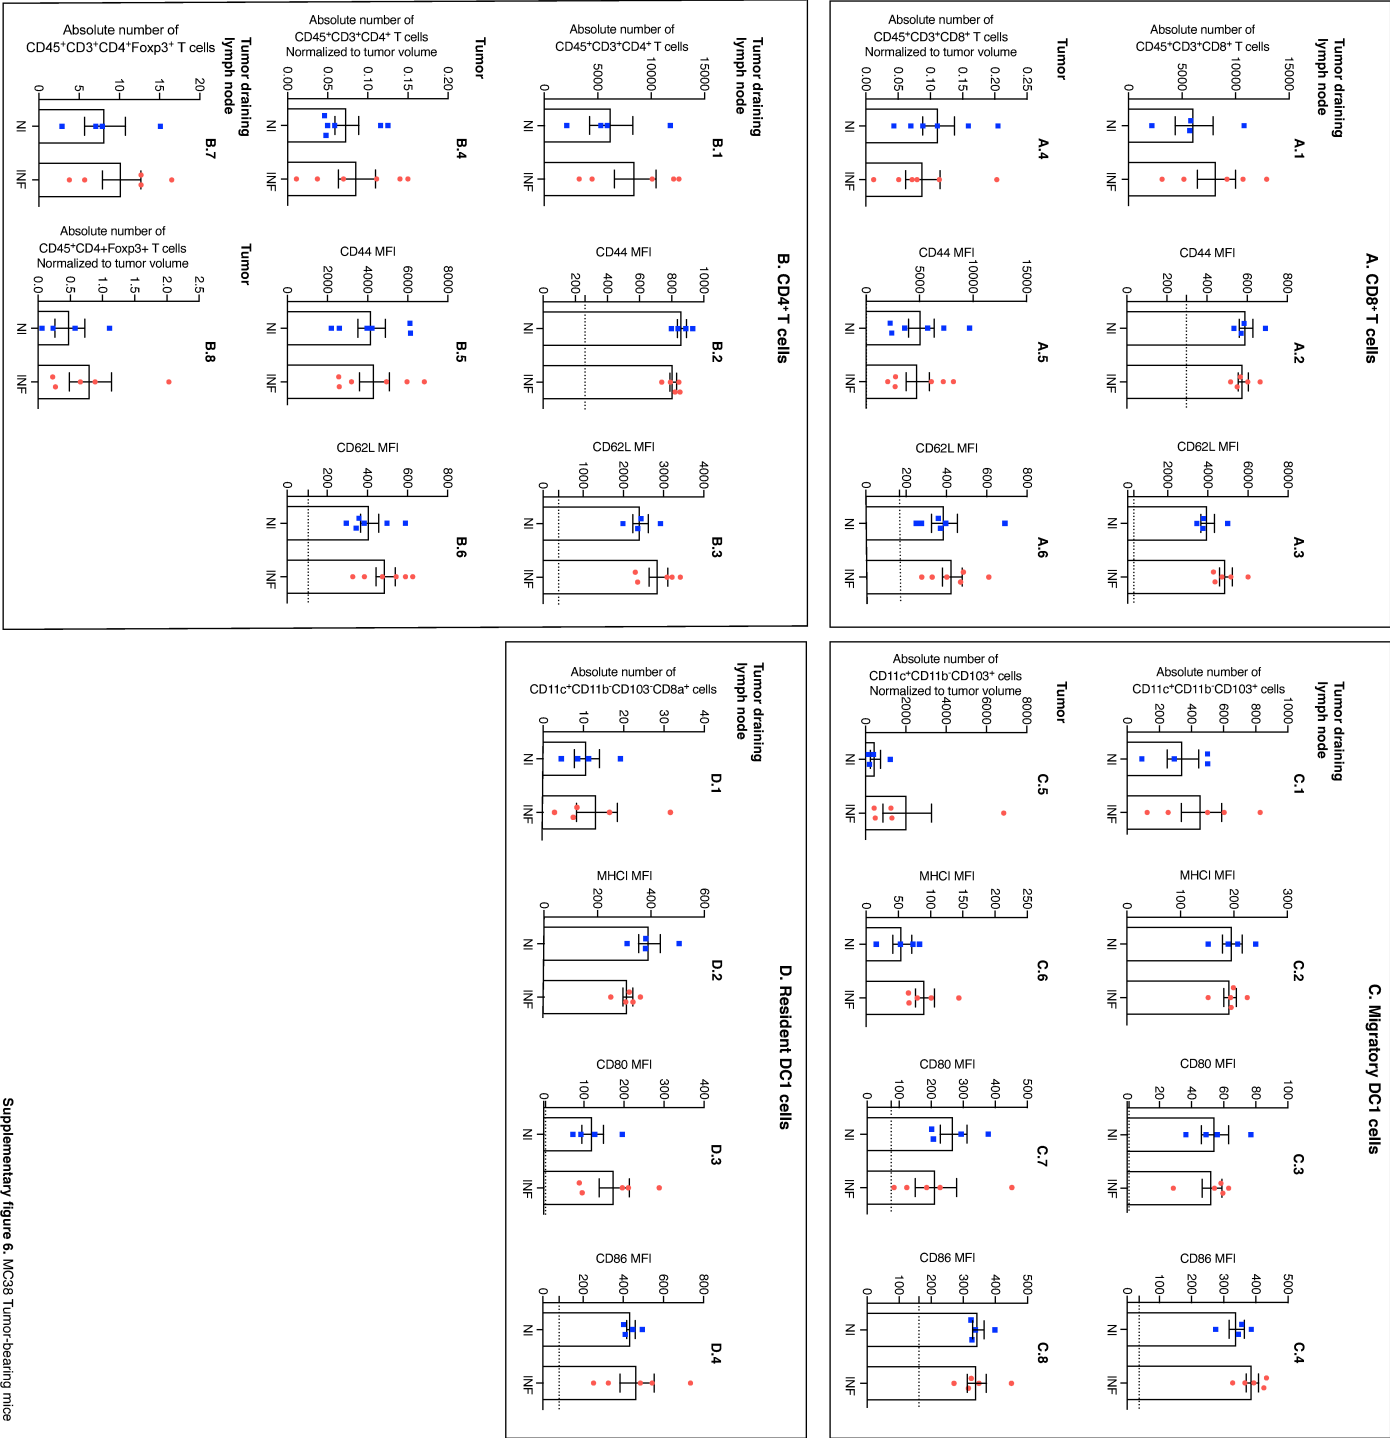

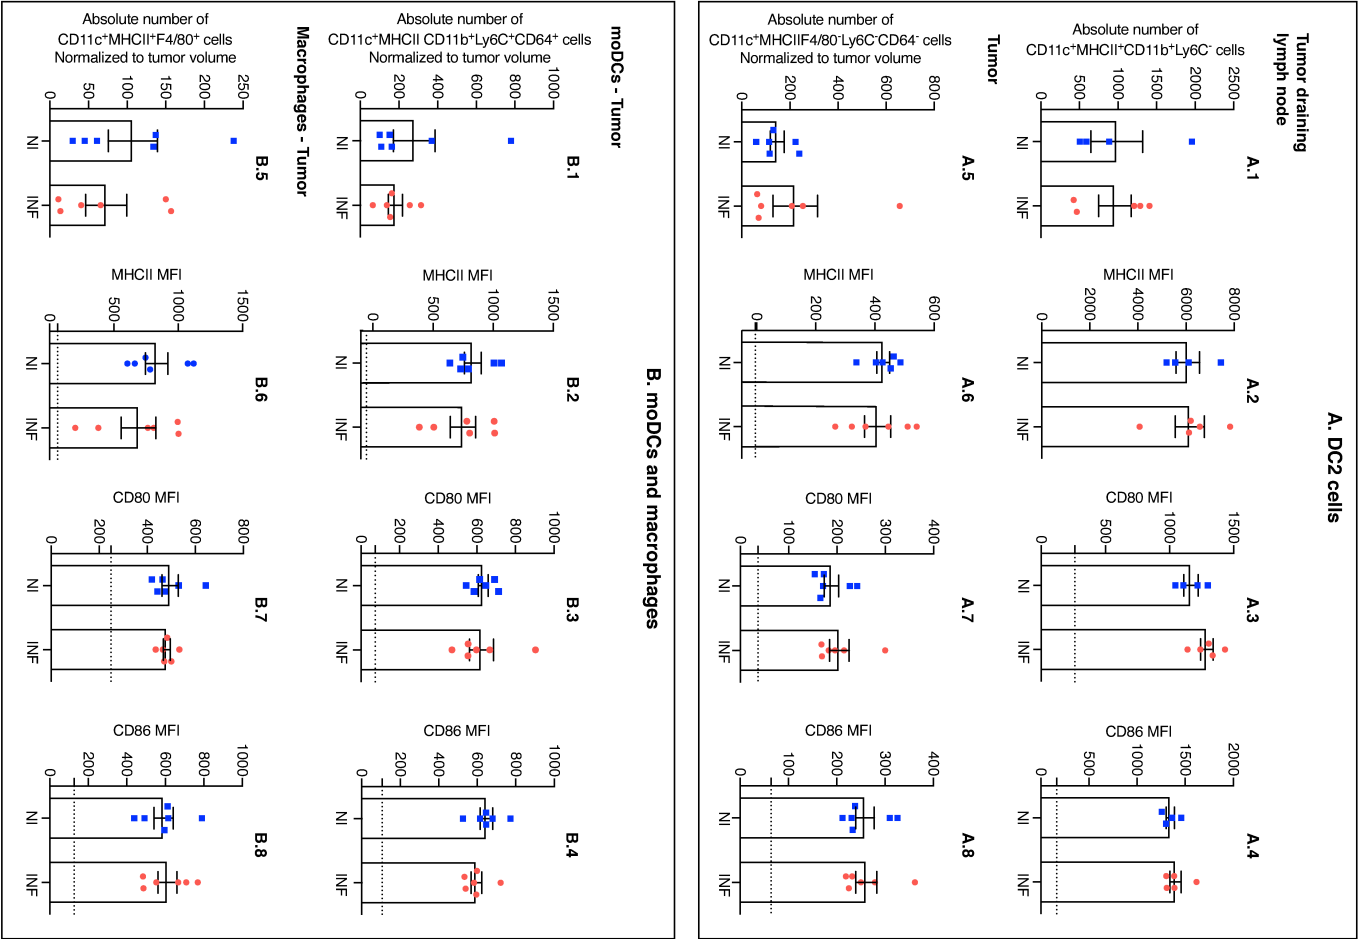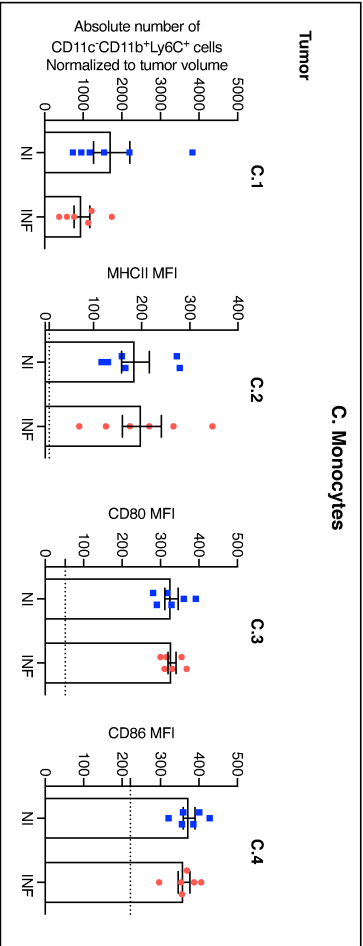

Supplementary figure 7. MC38 Tumor-bearing mice

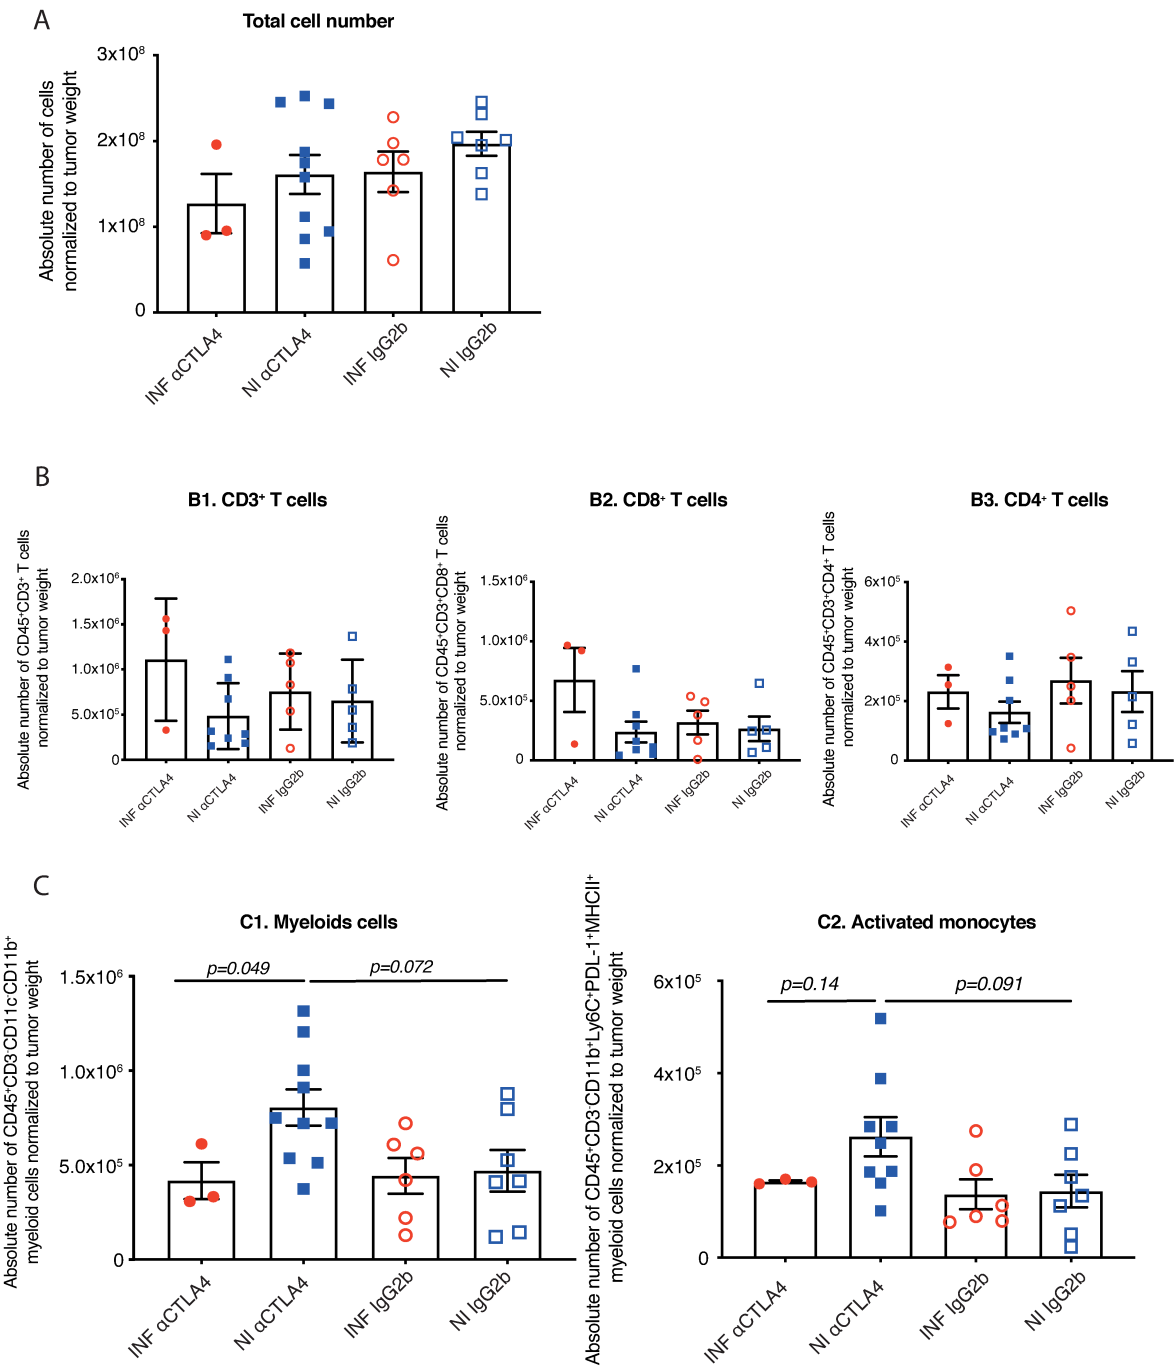

**Supplementary figure 8.**  
*H. pylori* substantially affects tumor myeloids cells in MC38 tumor-bearing mice undergoing anti-CTLA4 immunotherapy.



A     **Absolute number and activation status of OT-I cells**

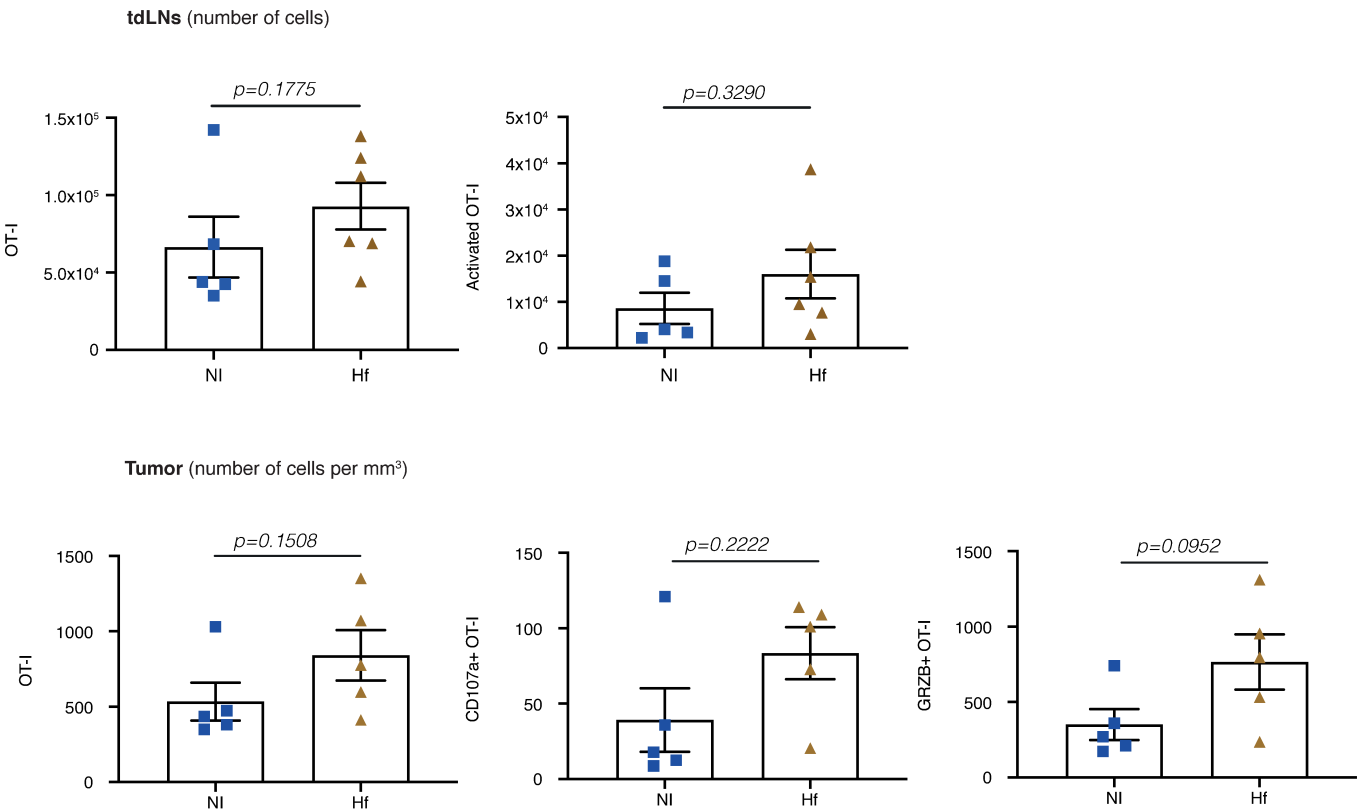

B     **Vaccine-induced cytotoxic activities of OT-I cells**

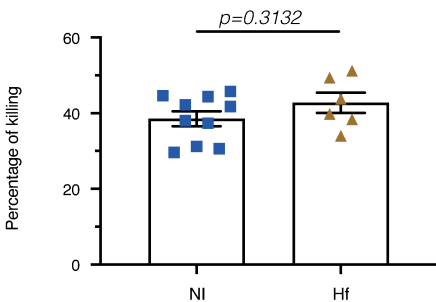

**Supplementary figure 9.** *H. felis* infection does not jeopardize the tumor specific immune response

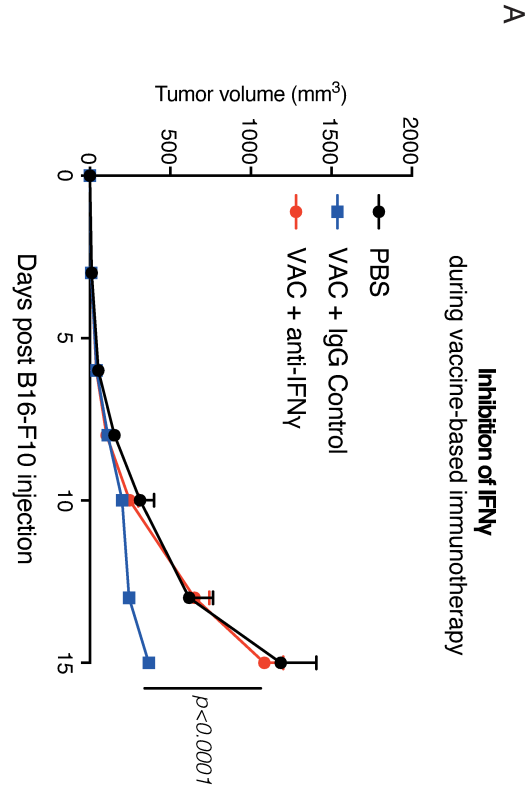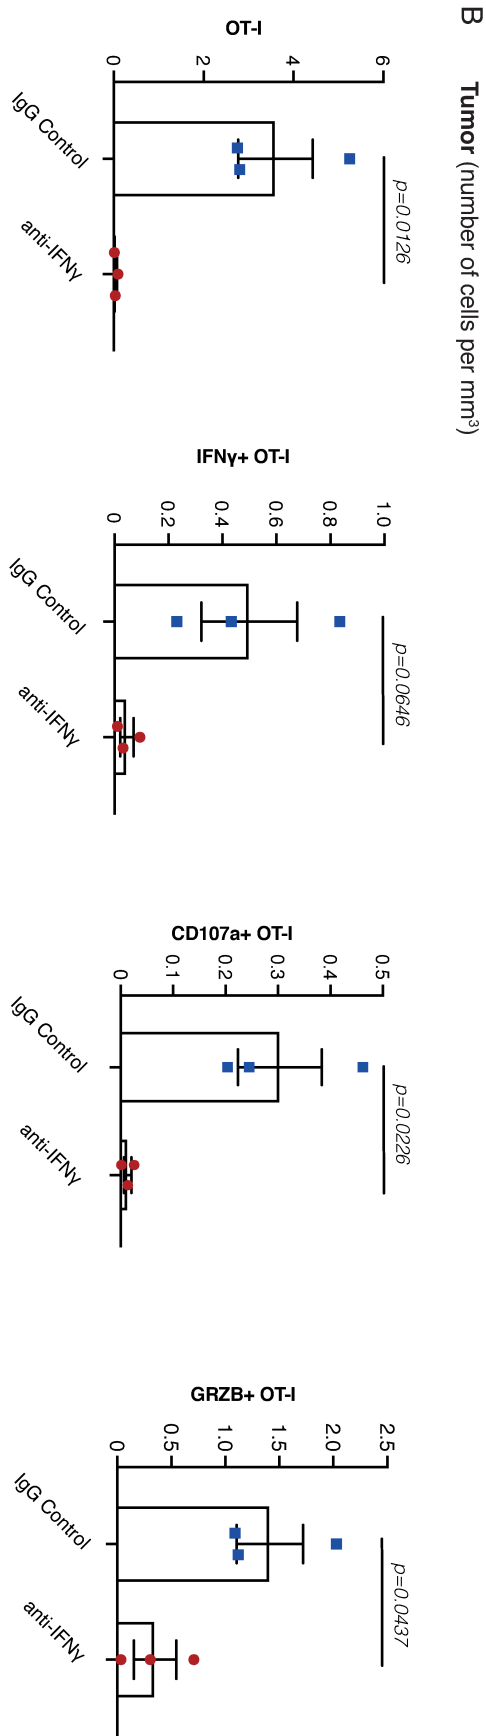

**Supplementary figure 10.** Effect of neutralization of IFN $\gamma$  on the efficacy of vaccine-based cancer immunotherapy

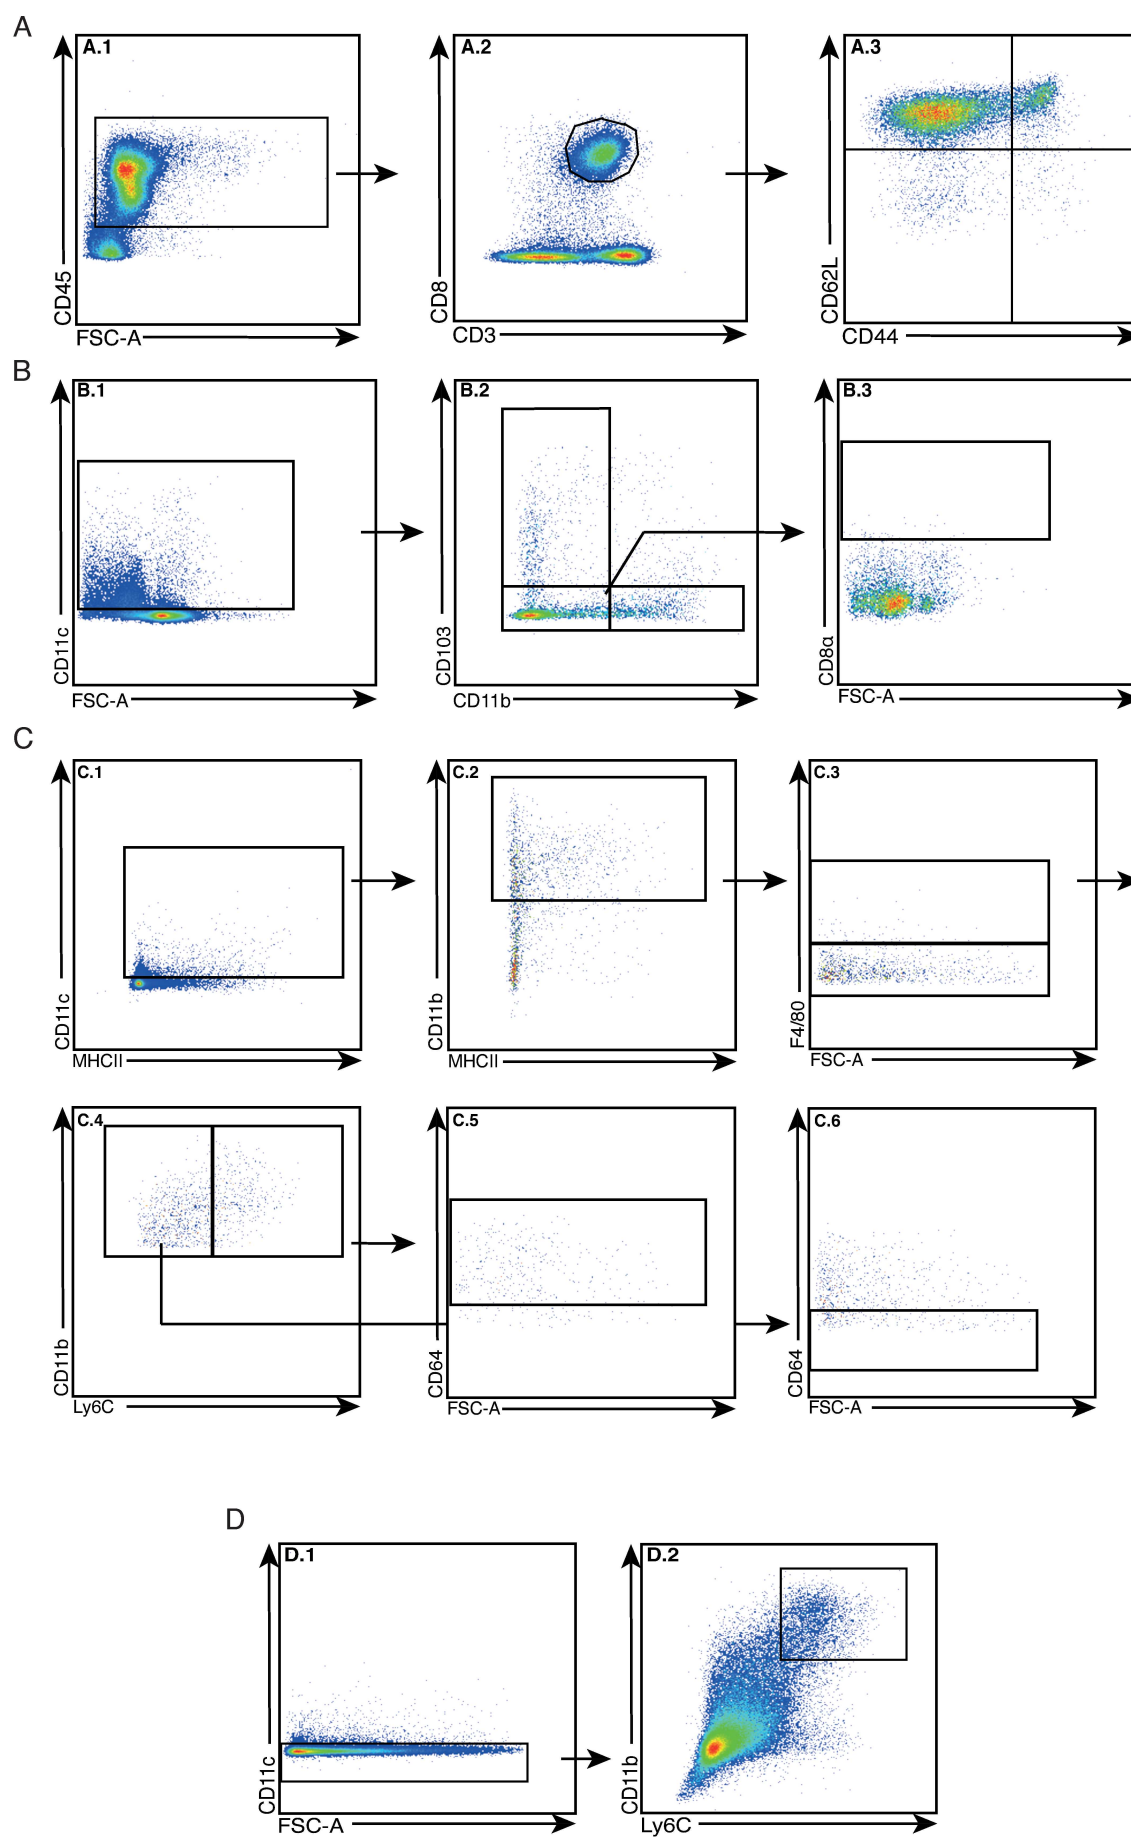

Supplementary figure 11. Gating strategy

**Supplementary table 1. Summary of clinical characteristics of the Dijon cohort**

| Variable                      |                  |         |
|-------------------------------|------------------|---------|
| Sexe-no.(%)                   | Female           | 14 (24) |
|                               | Male             | 45 (76) |
| Age-yr (median, IQR)          |                  | 66 (13) |
| WHO performance status-no.(%) | 0                | 26 (44) |
|                               | 1                | 31 (52) |
|                               | 2                | 2 (1)   |
| Histology-no.(%)              | Nonsquamous-cell | 34 (59) |
|                               | Squamous-cell    | 24 (41) |
|                               | NA               | 2       |
| Stage-no.(%)                  | IIIB             | 8 (14)  |
|                               | IV               | 51 (86) |
| Smoker-no.(%)                 | No               | 6 (10)  |
|                               | Yes              | 53 (90) |

**Univariate and multivariate Cox models for overall survival**

| Features   |              | Univariate |           |         | Multivariate |           |         |
|------------|--------------|------------|-----------|---------|--------------|-----------|---------|
|            |              | HR         | 95%CI     | p-value | HR           | 95%CI     | p-value |
| Age        |              | 0.98       | 0.94-1.02 | p=0.420 | 0.98         | 0.93-1.03 | p=0.344 |
| Gender     | Female       | -          |           |         | -            |           |         |
|            | Male         | 1.16       | 0.53-2.56 | p=0.711 | 0.87         | 0.36-2.12 | p=0.765 |
| WHO PS     | 0            | -          |           |         | -            |           |         |
|            | ≥1           | 1.00       | 0.52-1.93 | p=0.999 | 1.19         | 0.56-2.52 | p=0.658 |
| Histology  | Non squamous | -          |           |         | -            |           |         |
|            | Squamous     | 1.22       | 0.62-2.40 | p=0.556 | 0.94         | 0.43-2.08 | p=0.879 |
| Smoker     | Never        | -          |           |         | -            |           |         |
|            | Ever         | 1.28       | 0.45-3.65 | p=0.642 | 1.21         | 0.34-4.32 | p=0.774 |
| Stage      | IIIB         | -          |           |         | -            |           |         |
|            | IV           | 0.60       | 0.24-1.49 | p=0.271 | 0.66         | 0.20-2.14 | p=0.491 |
| H.p status | Seronegative | -          |           |         | -            |           |         |
|            | Seropositive | 3.35       | 1.69-6.66 | p=0.001 | 3.71         | 1.77-7.77 | p=0.001 |

H.p : Helicobacter pylori; WHO PS: World Health Organisation (WHO) performance status

**Univariate and multivariate Cox models for progression free survival**

| Features   |              | Univariate |           |         | Multivariate |           |         |
|------------|--------------|------------|-----------|---------|--------------|-----------|---------|
|            |              | HR         | 95%CI     | p-value | HR           | 95%CI     | p-value |
| Age        |              | 0.95       | 0.92-0.98 | p=0.005 | 0.94         | 0.90-0.98 | p=0.003 |
| Gender     | Female       | -          |           |         | -            |           |         |
|            | Male         | 0.58       | 0.30-1.11 | p=0.102 | 0.74         | 0.34-1.60 | p=0.440 |
| WHO PS     | 0            | -          |           |         | -            |           |         |
|            | ≥1           | 0.85       | 0.48-1.53 | p=0.595 | 0.88         | 0.46-1.70 | p=0.713 |
| Histology  | Non squamous | -          |           |         | -            |           |         |
|            | Squamous     | 1.36       | 0.76-2.43 | p=0.304 | 1.76         | 0.87-3.54 | p=0.115 |
| Smoker     | Never        | -          |           |         | -            |           |         |
|            | Ever         | 0.62       | 0.26-1.47 | p=0.277 | 0.50         | 0.17-1.45 | p=0.203 |
| Stage      | IIIB         | -          |           |         | -            |           |         |
|            | IV           | 1.41       | 0.60-3.33 | p=0.432 | 1.07         | 0.40-2.84 | p=0.899 |
| H.p status | Seronegative | -          |           |         | -            |           |         |
|            | Seropositive | 1.39       | 0.75-2.59 | p=0.292 | 1.51         | 0.80-2.84 | p=0.201 |

H.p : Helicobacter pylori; WHO PS: World Health Organisation (WHO) performance status

Supplementary table 2. Summary of clinical characteristics of the Montreal cohort

| Features                     |                            | N = 29           |
|------------------------------|----------------------------|------------------|
| Age-yrs                      | Median (IQR)               | 65 (46-79)       |
| Sex                          | Female                     | 16 (55%)         |
|                              | Male                       | 13 (45%)         |
| Smoking habits               | Never                      | 1 (3%)           |
|                              | Former or current          | 28 (97%)         |
| Obesity (kg/m <sup>2</sup> ) | Median (IQR)               | 25.7 (15.5-37.5) |
| ECOG                         | 0                          | 14 (48%)         |
|                              | 1-2                        | 15 (52%)         |
| Histology                    | Adenocarcinoma             | 21 (72%)         |
|                              | Squamous-cell              | 7 (25%)          |
|                              | NSCLC                      | 1 (3%)           |
| Stage                        | 3A                         | 3 (10%)          |
|                              | 3B                         | 4 (14%)          |
|                              | 4                          | 22 (76%)         |
| PD-L1 expression             | <1%                        | 7 (24%)          |
|                              | 1-49%                      | 7 (24%)          |
|                              | >50%                       | 13 (45%)         |
|                              | Unknown                    | 2 (7%)           |
| Prior chemotherapy           | No                         | 15 (52%)         |
|                              | Yes                        | 14 (48%)         |
| ICB                          | Atezolizumab               | 2 (7%)           |
|                              | Durvalumab                 | 2 (7%)           |
|                              | Durvalumab/Tremelimumab    | 5 (17%)          |
|                              | Nivolumab                  | 4 (14%)          |
|                              | Nivolumab/Pembrolizumab    | 1 (3%)           |
|                              | Pembrolizumab              | 13 (46%)         |
|                              | Pembrolizumab/Chemotherapy | 1 (3%)           |
|                              | Pembrolizumab/Tremelimumab | 1 (3%)           |
|                              |                            |                  |
| Progression-free survival    | Median [95%CI]             | 4.4 [2.7-10.8]   |

Univariate and multivariate Cox models for overall survival

| Features   |              | Univariate |            |         | Multivariate |           |         |
|------------|--------------|------------|------------|---------|--------------|-----------|---------|
|            |              | HR         | 95%CI      | p-value | HR           | 95%CI     | p-value |
| Age        |              | 0.97       | 0.91-1.03  | 0.25    | 0.95         | 0.88-1.02 | 0.16    |
| Sex        | Female       |            | -          |         |              | -         |         |
|            | Male         | 0.83       | 0.29-2.33  | 0.72    | 0.31         | 0.06-1.75 | 0.18    |
| ECOG       | 0            |            | -          |         |              | -         |         |
|            | ≥1           | 0.90       | 0.32-2.50  | 0.84    | 0.60         | 0.16-2.29 | 0.45    |
| Histology  | ADK          |            | -          |         |              | -         |         |
|            | EPI          | 1.27       | 0.40-4.02  | 0.68    | 2.97         | 0.43-20.7 | 0.27    |
| Stage      | IIIA-IIIB    |            | -          |         |              | -         |         |
|            | IV           | 2.37       | 0.53-10.52 | 0.26    | 2.04         | 0.43-9.68 | 0.37    |
| H.p status | Seronegative |            | -          |         |              | -         |         |
|            | Seropositive | 1.73       | 0.58-5.19  | 0.14    | 2.30         | 0.55-9.59 | 0.25    |

Univariate and multivariate Cox models for progression free survival

| Features   |              | Univariate |           |         | Multivariate |           |         |
|------------|--------------|------------|-----------|---------|--------------|-----------|---------|
|            |              | HR         | 95%CI     | p-value | HR           | 95%CI     | p-value |
| Age        |              | 1.00       | 0.95-1.05 | 0.99    | 0.96         | 0.90-1.04 | 0.31    |
| Sex        | Female       |            | -         |         |              | -         |         |
|            | Male         | 1.10       | 0.49-2.45 | 0.82    | 0.37         | 0.11-1.23 | 0.10    |
| ECOG       | 0            |            | -         |         |              | -         |         |
|            | ≥1           | 0.68       | 0.31-1.53 | 0.35    | 0.57         | 0.15-2.16 | 0.40    |
| Histology  | ADK          |            | -         |         |              | -         |         |
|            | EPI          | 1.71       | 0.68-4.32 | 0.26    | 3.23         | 0.79-13.2 | 0.10    |
| Stage      | IIIA-IIIB    |            | -         |         |              | -         |         |
|            | IV           | 1.81       | 0.71-4.59 | 0.21    | 2.60         | 0.86-7.86 | 0.09    |
| H.p status | Seronegative |            | -         |         |              | -         |         |
|            | Seropositive | 2.39       | 1.01-5.65 | 0.048   | 3.53         | 1.05-11.8 | 0.04    |
